# Supplementary material
Source: PubMed Central journal article supplement (PMC6075456)
Supplement: dex052suppl_table1.pdf [file dex052suppl_table1.pdf]

**Supplementary Table S1** Fecundability odds ratio of ultrasound-confirmed pregnancy by maternal lipid levels.

|                           | Ultrasound-confirmed pregnancy FOR (95% CI) | Model 1 Ultrasound-confirmed pregnancy FOR (95% CI) <sup>a</sup> | Model 2 Ultrasound-confirmed pregnancy FOR (95% CI) <sup>b</sup> | Model 3 Ultrasound-confirmed pregnancy FOR (95% CI) <sup>c</sup> | Model 4 Ultrasound-confirmed pregnancy FOR (95% CI) <sup>d</sup> |
|---------------------------|---------------------------------------------|------------------------------------------------------------------|------------------------------------------------------------------|------------------------------------------------------------------|------------------------------------------------------------------|
| Total cholesterol (mg/dl) |                                             |                                                                  |                                                                  |                                                                  |                                                                  |
| <200                      | Reference                                   | Reference                                                        | Reference                                                        | Reference                                                        | Reference                                                        |
| ≥200                      | 0.69 (0.53, 0.89) <sup>e</sup>              | 0.69 (0.53, 0.90) <sup>e</sup>                                   | 0.71 (0.55, 0.93) <sup>e</sup>                                   | 0.81 (0.62, 1.05)                                                | 0.75 (0.53, 1.07)                                                |
| LDL-C calculated (mg/dl)  |                                             |                                                                  |                                                                  |                                                                  |                                                                  |
| <130                      | Reference                                   | Reference                                                        | Reference                                                        | Reference                                                        | Reference                                                        |
| ≥130                      | 0.66 (0.47, 0.92) <sup>e</sup>              | 0.60 (0.40, 0.89) <sup>e</sup>                                   | 0.64 (0.43, 0.96) <sup>e</sup>                                   | 0.68 (0.45, 1.02)                                                | 0.66 (0.44, 0.99) <sup>e</sup>                                   |
| HDL-C (mg/dl)             |                                             |                                                                  |                                                                  |                                                                  |                                                                  |
| <50                       | 0.81 (0.69, 0.96) <sup>e</sup>              | 0.80 (0.68, 0.95) <sup>e</sup>                                   | 0.80 (0.68, 0.95) <sup>e</sup>                                   | 0.90 (0.75, 1.07)                                                | 0.82 (0.69, 0.98) <sup>e</sup>                                   |
| ≥50                       | Reference                                   | Reference                                                        | Reference                                                        | Reference                                                        | Reference                                                        |
| Triglycerides (mg/dl)     |                                             |                                                                  |                                                                  |                                                                  |                                                                  |
| <150                      | Reference                                   | Reference                                                        | Reference                                                        | Reference                                                        | Reference                                                        |
| ≥150                      | 0.78 (0.65, 0.95) <sup>e</sup>              | 0.82 (0.66, 1.01)                                                | 0.79 (0.64, 0.97) <sup>e</sup>                                   | 0.89 (0.72, 1.11)                                                | 0.85 (0.69, 1.05)                                                |

FOR, fecundability odds ratio; LDL-C, low-density lipoprotein cholesterol; HDL-C, high-density lipoprotein cholesterol. FOR < 1.0 indicates reduced fecundability.

<sup>a</sup>Model 1: adjusted for age, race, education, alcohol use, total cholesterol (excluding total cholesterol model).

<sup>b</sup>Model 2: model 1 plus fasting status and total serum-free fatty acid.

<sup>c</sup>Model 3: model 1 plus BMI.

<sup>d</sup>Model 4: model 1 plus waist-hip ratio.

<sup>e</sup>P-value < 0.05.
