# Supplementary material
Source: PubMed Central journal article supplement (PMC6075456)
Supplement: dex052suppl_table2.pdf [file dex052suppl_table2.pdf]

**Supplementary Table SII Adjusted fecundability odds ratio of pregnancy by continuous maternal lipid levels.**

|                           | <b>Model 1<br/>hCG-detected<br/>pregnancy<br/>FOR (95% CI)<sup>a</sup></b> | <b>Model 2<br/>hCG-detected<br/>pregnancy<br/>FOR (95% CI)<sup>b</sup></b> | <b>Model 1<br/>Ultrasound-confirmed<br/>pregnancy<br/>FOR (95% CI)<sup>a</sup></b> | <b>Model 2<br/>Ultrasound-confirmed<br/>pregnancy<br/>FOR (95% CI)<sup>b</sup></b> |
|---------------------------|----------------------------------------------------------------------------|----------------------------------------------------------------------------|------------------------------------------------------------------------------------|------------------------------------------------------------------------------------|
| Per 10-unit change        |                                                                            |                                                                            |                                                                                    |                                                                                    |
| Total cholesterol (mg/dl) | 0.979 (0.951, 1.006)                                                       | 0.995 (0.967, 1.023)                                                       | 0.973 (0.945, 1.001)                                                               | 0.988 (0.960, 1.019)                                                               |
| LDL-C calculated (mg/dl)  | 0.934 (0.870, 1.002)                                                       | 0.983 (0.952, 1.015)                                                       | 0.933 (0.868, 1.004)                                                               | 0.977 (0.945, 1.010)                                                               |
| HDL-C (mg/dl)             | 1.110 (1.043, 1.181) <sup>c</sup>                                          | 1.062 (0.993, 1.136)                                                       | 1.136 (1.061, 1.217) <sup>c</sup>                                                  | 1.076 (0.999, 1.158)                                                               |
| Triglycerides (mg/dl)     | 0.990 (0.978, 1.002)                                                       | 0.997 (0.985, 1.009)                                                       | 0.988 (0.976, 1.002)                                                               | 0.995 (0.983, 1.008)                                                               |

FOR, fecundability odds ratio; LDL-C, low-density lipoprotein cholesterol; HDL-C, high-density lipoprotein cholesterol. FOR < 1.0 indicates reduced fecundability.

<sup>a</sup>Model 1: adjusted for age, race, education, alcohol use, total cholesterol (excluding total cholesterol model), fasting status and total serum-free fatty acid.

<sup>b</sup>Model 2: model 1 plus BMI.

<sup>c</sup>P-value < 0.05.
